# Supplementary material for: Higher Intensity of Salt Stress Accompanied by Heat Inhibits Stomatal Conductance and Induces ROS Accumulation in Tomato Plants
Source: MDPI journal article supplement (doi:10.3390/antiox13040448), 2024-04-10
Supplement: s1 [file s1]

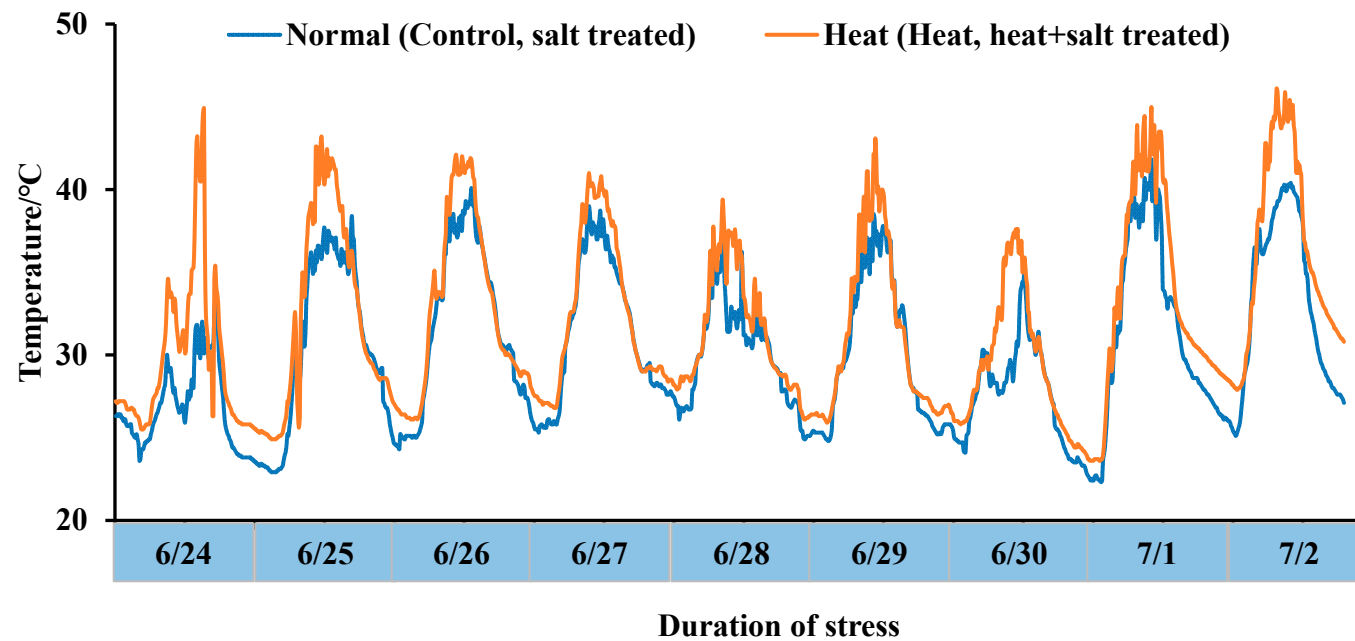

**Figure S1.** Environmental temperature during stress treatments. Blue colour represents temperature under control and salt stress. Orange colour represents the temperature under heat stress and the combined heat and salt stress. The x-axis shows the 8 d duration of the stress treatment from 24 June 2023 to 2 July 2023.

**Table S1.** Information on key genes in photosynthesis, ROS and Rubisco pathways in response to combined heat and salt stresses

| Gene ID          | Gene Name     | Description                                                                         |
|------------------|---------------|-------------------------------------------------------------------------------------|
| Solyc08g013670.3 | <i>psaN</i>   | Photosystem I reaction centre subunit N                                             |
| Solyc02g070990.1 | <i>LHCB1</i>  | Chlorophyll A-B binding protein                                                     |
| Solyc02g065400.3 | <i>psbo</i>   | 33kDa precursor protein of oxygen-evolving complex                                  |
| Solyc09g007270.3 | <i>APX2</i>   | L-ascorbate peroxidase 2, cytosolic                                                 |
| Solyc01g067740.3 | <i>SODCC1</i> | Cu <sup>2+</sup> /Zn <sup>2+</sup> Superoxide dismutase 1, cytosolic, chloroplastic |
| Solyc06g005160.3 | <i>APX1</i>   | cytosolic ascorbate peroxidase 1                                                    |
| Solyc03g034220.3 | <i>rbcS2A</i> | ribulose biphosphate carboxylase small chain 2A                                     |
| Solyc02g085950.3 | <i>RbcS3B</i> | ribulose biphosphate carboxylase small chain 3B                                     |

**Table S2.** qRT-PCR primer sequence information

| Gene                     | Forward Primer Sequence (5'-3') | Reverse Primer Sequence (5'-3') |
|--------------------------|---------------------------------|---------------------------------|
| Solyc08g013670.3         | TGGCTACAAGTGGTGCGAAT            | GTCCTTGCCTTCACACTCCA            |
| Solyc02g070990.1         | TCTTCCCCTTCTTTTGTGGG            | TCACCAGAGAATGGGCCTAAG           |
| Solyc02g065400.3         | CCATTGAAGGAGGTGTTGGC            | TGATGTGGGCTCTAGGCAGA            |
| Solyc09g007270.3         | TCCGCCCTCTAGTCGAGAAA            | CAGCATCTGCAAATCCGAGC            |
| Solyc01g067740.3         | TCTCACTGGTCCACAGTCCA            | CCAGCATTTCCGGTGCTTTT            |
| Solyc06g005160.3         | CATACCTTGGGAAGGGCACA            | TTCCCCACTCAAAAGCTCCG            |
| Solyc03g034220.3         | TCCTGATTTGTCTGACGAGCAA          | CTTGAACCTCAGCCAACACTTG          |
| Solyc02g085950.3         | TGCTCAGCGAAATTGAGTACCT          | GGTCCAGTATCTGCCATCGTAG          |
| <i>Actin</i> (reference) | CTCTACATACTTGAGAGGTGCC          | AGACGAGGAGAAAACATCACAA          |
